# Supplementary material
Source: HighWire-hosted journal article supplement (https://bmjopen.bmj.com/content/11/11/e051584)
Supplement: inline-supplementary-material-1 [file inline-supplementary-material-1.pdf]

**Supplementary Table 1. Definitions and treatments for adverse events.**

| Hemodynamic Fluctuation | Definition*                                              | Standard Treatment Algorithm                                                                                                                                                                                                                         |
|-------------------------|----------------------------------------------------------|------------------------------------------------------------------------------------------------------------------------------------------------------------------------------------------------------------------------------------------------------|
| Hypotension             | SBP less than 95 mmHg, or lower than 30% of baseline     | Increase propofol or remifentanyl infusion rate according to BIS, increase, or administer sufentanyl (0.1-0.2µg/kg); if correction still not achieved, nicardipine will be given as bolus and/or infusion                                            |
| Hypertension            | SBP higher than 180 mmHg, or higher than 30% of baseline | Decrease propofol or remifentanyl infusion rate according to BIS; if correction still not achieved, vasoactive agent administration (dopamine, norepinephrine, or phenylephrine) will be given and adjusted according to the blood pressure response |
| Tachycardia Episode     | HR higher than 100 bpm                                   | Esmolol bolus and/or infusion according to heart rate response                                                                                                                                                                                       |
| Bradycardia Episode     | HR lower than 40 bpm                                     | Atropine administration                                                                                                                                                                                                                              |
| Hypoxemia               | Pulse oxygen saturation lower than 90%                   | Administration of oxygen and adjustment of mechanical ventilation for patients without and with endotracheal intubation.                                                                                                                             |

\* if any of the below changes are sustained for equal and/or longer than 5 min; Abbreviations: SBP, systolic blood pressure; HR, heart rate; bpm, beat per minute.
